# Supplementary material
Source: Springer Nature journal article supplement (https://www.springermedizin.de/resource/supplementary/12891_2010_1167_MOESM2_ESM.pdf/9507242)

(A) TNF $\alpha$

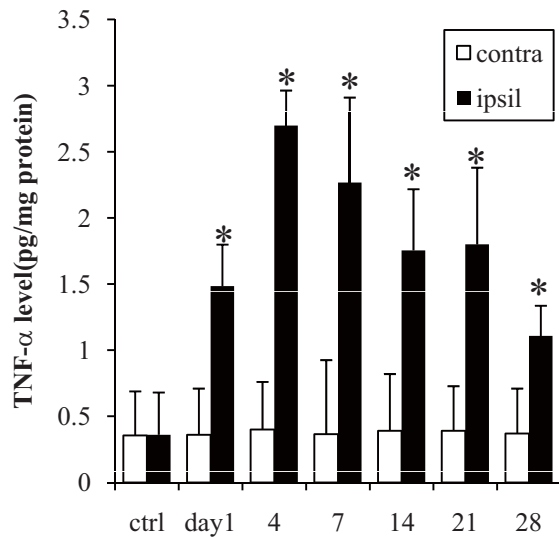

(B) IL-6

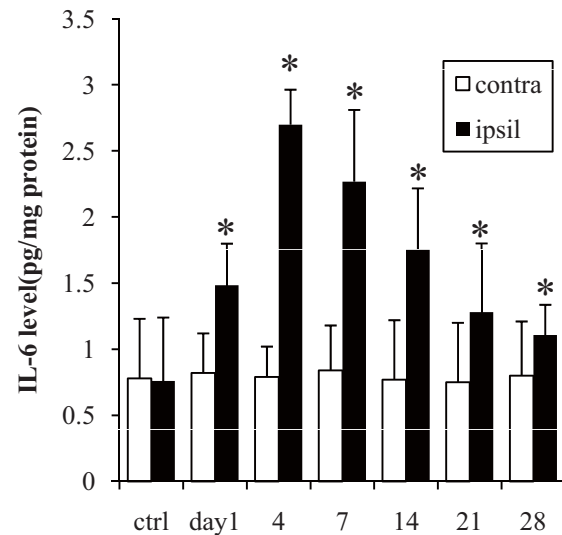

(C) NGF

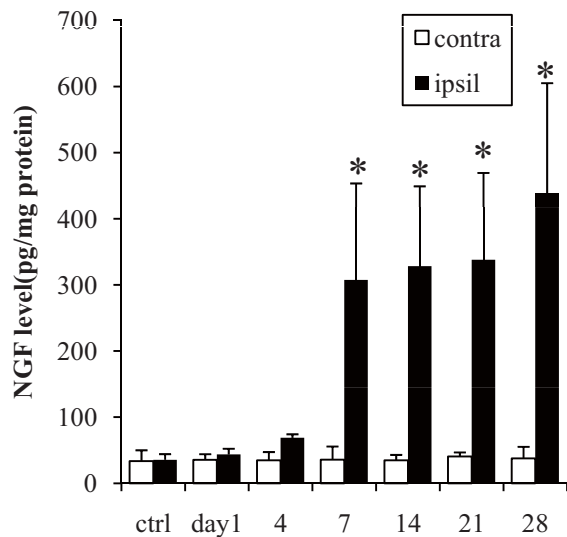

\*:  $P < 0.05$  vs Ctrl

Supplement: MOESM2 [file 9507242]
